# Supplementary material for: The Effect of Combined Atmospheric Plasma/UV Treatments on Improving the Durability of Flame Retardants Applied to Cotton
Source: MDPI journal article supplement (doi:10.3390/molecules27248737), 2022-12-09
Supplement: s1 [file s1]

## Supplementary Files

# The effect of combined atmospheric plasma/UV treatments on improving the durability of flame retardants applied to cotton

M.Ayesh, A.R.Horrocks, B.Kandola; School of Engineering, University of Bolton, Bolton, UK, BL1 5AB

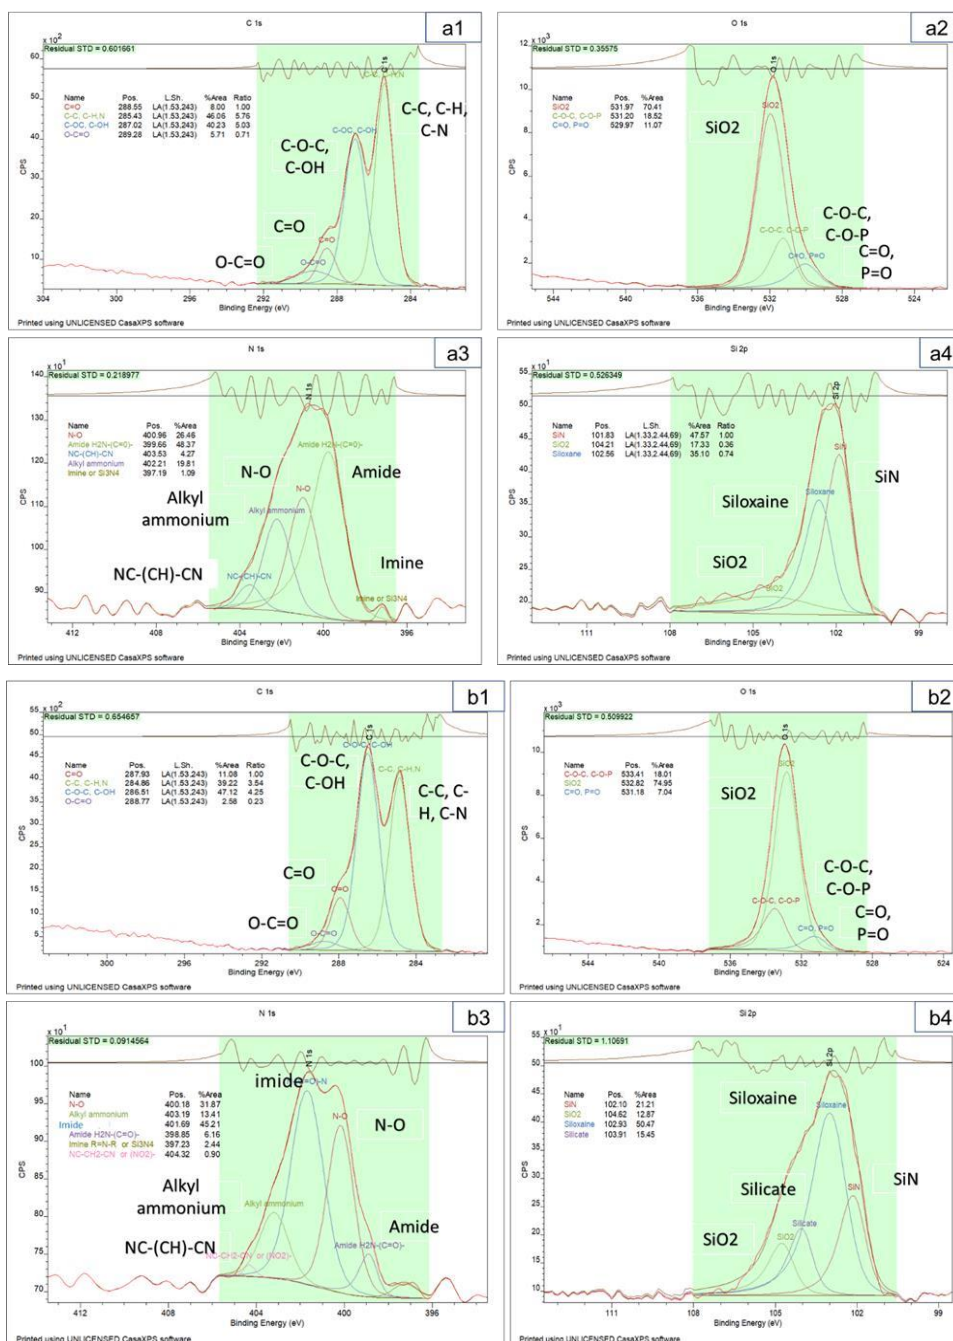

Figure S1: XPS high resolution spectra of the plasma/UV-treated cotton/FR fabric and Cot/FR after water-soaking. C 1s, O 1s, N 1s and Si 2p, respectively: (a1), (a2), (a3), (a4) Cot/DAP-urea-APTS-(ws), (b1), (b2), (b3), (b4) Cot/DAP-urea-APTS\_PL(N<sub>2</sub>/O<sub>2</sub>)-(ws)

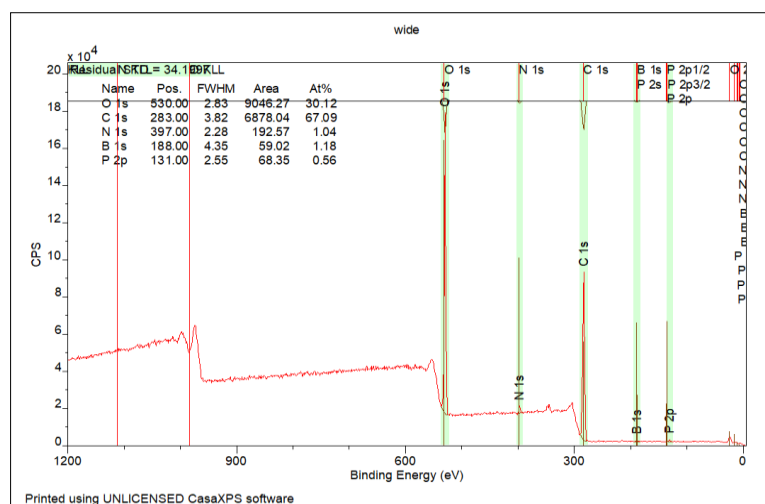

(a)

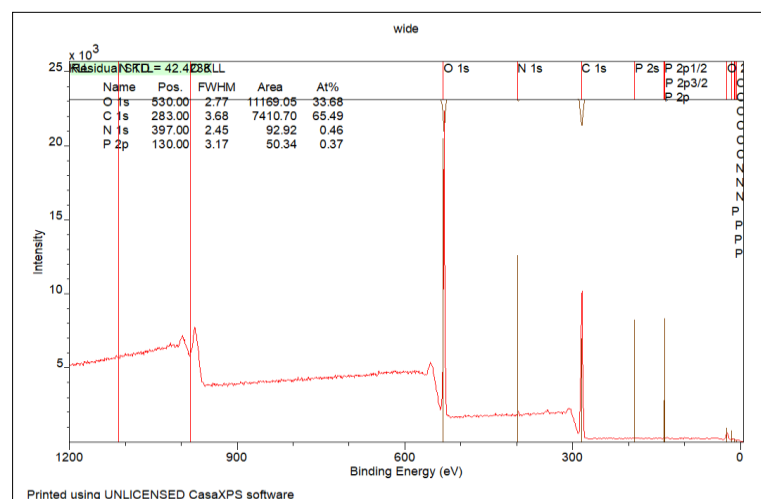

(b)

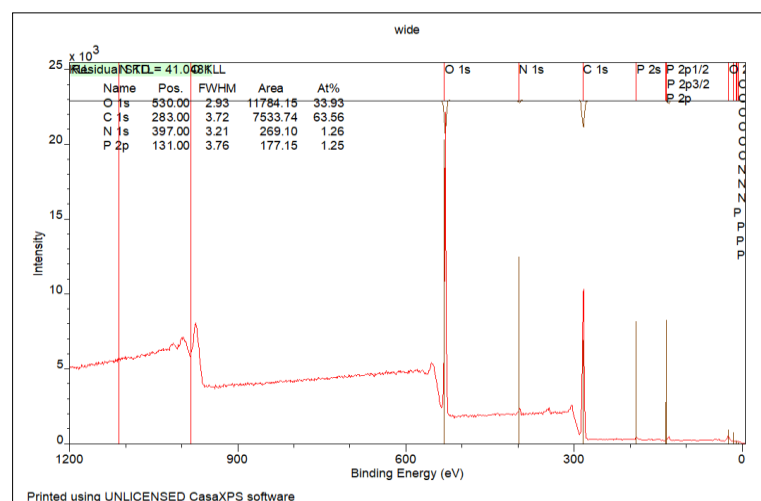

(c)

**Figure S2:** XPS spectra for Cotton/DBAP samples after water-soaking with and without plasma/UV laser treatment, (a) Cot/DBAP-(ws), (b) Cot\_PL(Ar/CO<sub>2</sub>)\_DBAP\_PL(N<sub>2</sub>/O<sub>2</sub>)-(ws) and (c) Cot/DBAP\_PL(N<sub>2</sub>/CO<sub>2</sub>)-(ws).

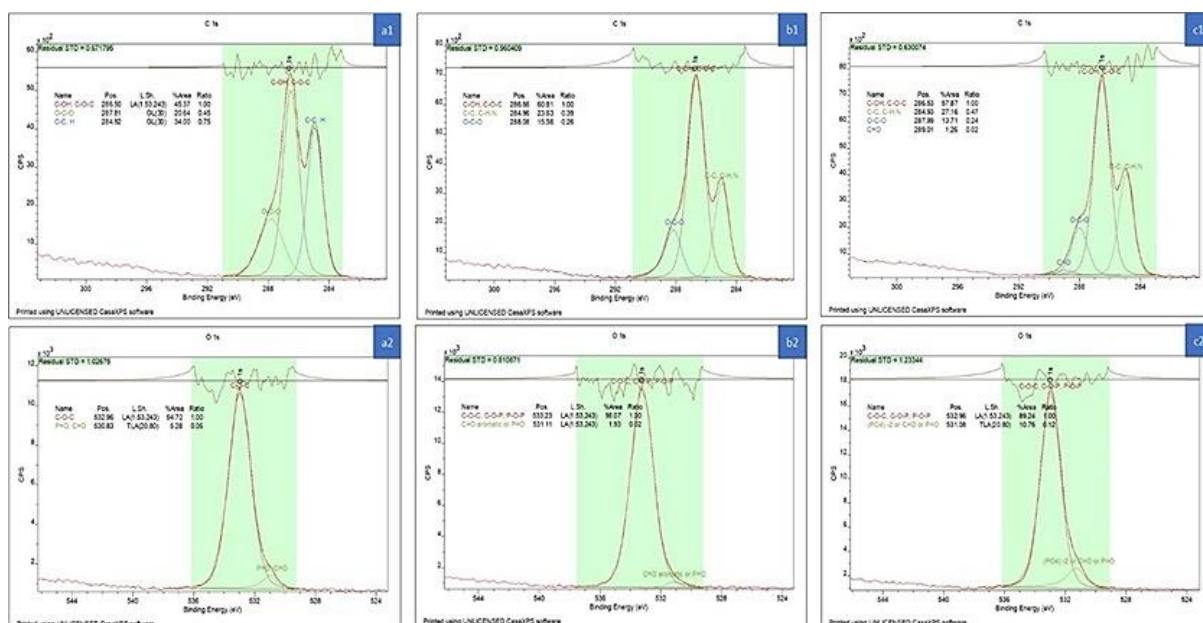

Figure S3: XPS high resolution spectra of the plasma/UV-treated cotton/FR fabric and control. C1s and O1s, respectively: (a1), (a2) Cot/DBAP, (b1), (b2) Cot\_PL(Ar/CO<sub>2</sub>)\_DBAP\_PL(N<sub>2</sub>/O<sub>2</sub>), (c1), (c2) Cot/DBAP\_PL(N<sub>2</sub>/CO<sub>2</sub>)

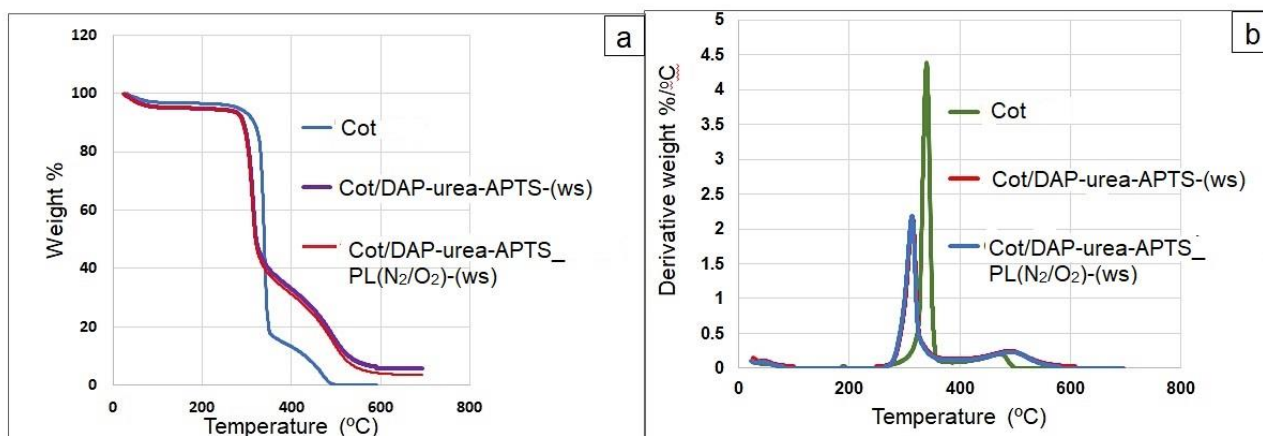

Figure S4: Thermal analysis traces of Cot/DAP-urea-APTS-(ws), Cot/DAP-urea-APTS\_PL(N<sub>2</sub>/O<sub>2</sub>)-(ws) samples and cotton controls, after water-soaking. (a) TGA and (b) DTG; note that the DTG responses of Cot/DAP-urea-APTS-(ws) and Cot/DAP-urea-APTS\_PL(N<sub>2</sub>/O<sub>2</sub>)-(ws) are almost superimposed (see also Table 8).

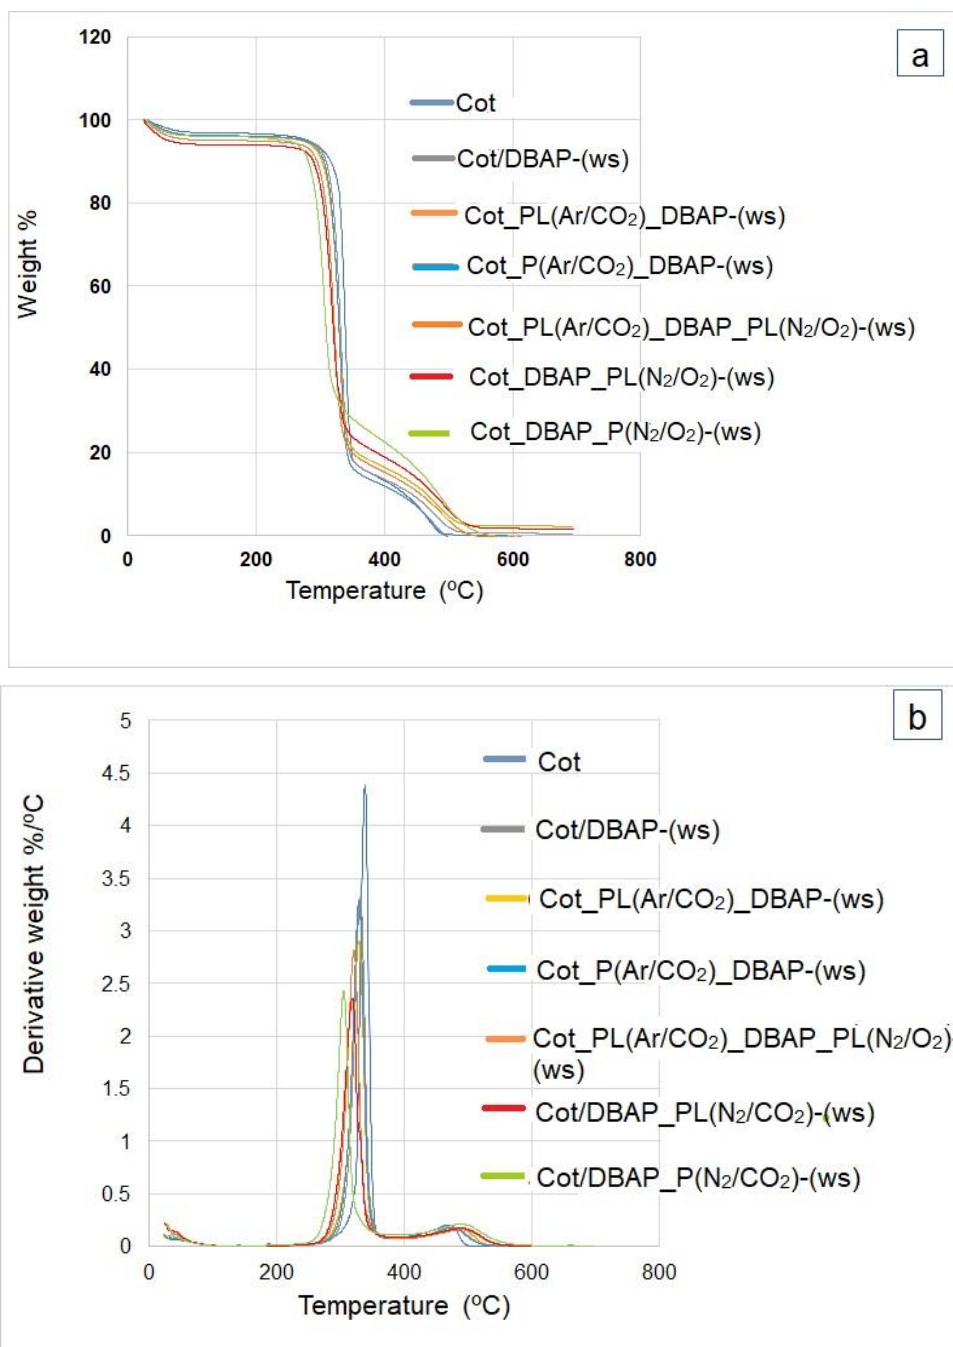

Figure S5: TA analysis for cotton (Cot) and Cot/DBAP samples before and after plasma/UV treatment after water-soaking.(a) TGA, (b) DTG (see also Table 8).

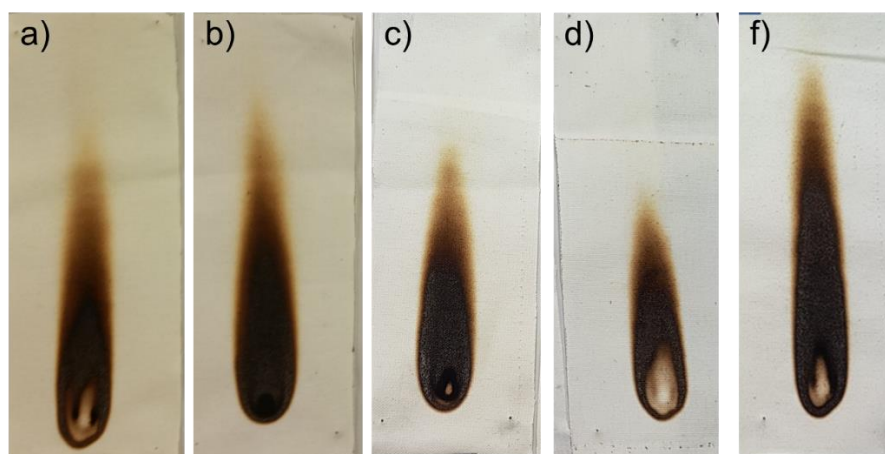

Figure S6: Vertical strip flammability test results before water-soaking for: (a) Cot/DBAP, (b) Cot\_PL(Ar/CO<sub>2</sub>)\_DBAP, (c) Cot\_P(Ar/CO<sub>2</sub>)\_DBAP (no UV laser), d) Cot/DBAP\_PL(N<sub>2</sub>/CO<sub>2</sub>), (f) Cot\_PL(Ar/CO<sub>2</sub>)\_DBAP\_PL(N<sub>2</sub>/O<sub>2</sub>)

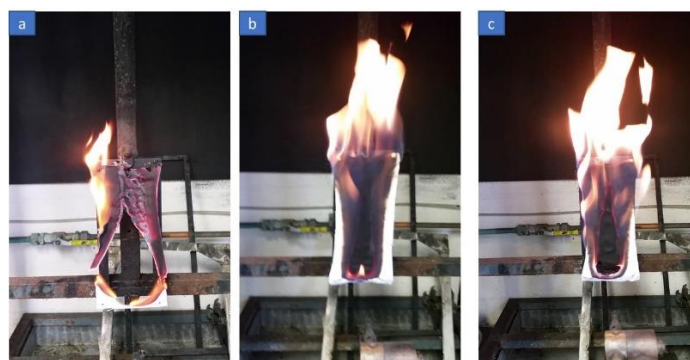

Figure S7: Vertical strip testing images after water-soaking selected samples after 10s ignition and a further 30s: (a) Cot, (b) Cot/DBAP, (c) Cot\_PL(Ar/CO<sub>2</sub>)\_DBAP
